# Supplementary material for: Nanobodies against Pfs230 block Plasmodium falciparum transmission
Source: PubMed Central journal article supplement (PMC9788556; doi:10.1042/bcj20220554), 2022-12-22
Supplement: BCJ-479-2529-s1.pdf [file BCJ-479-2529-s1.pdf]

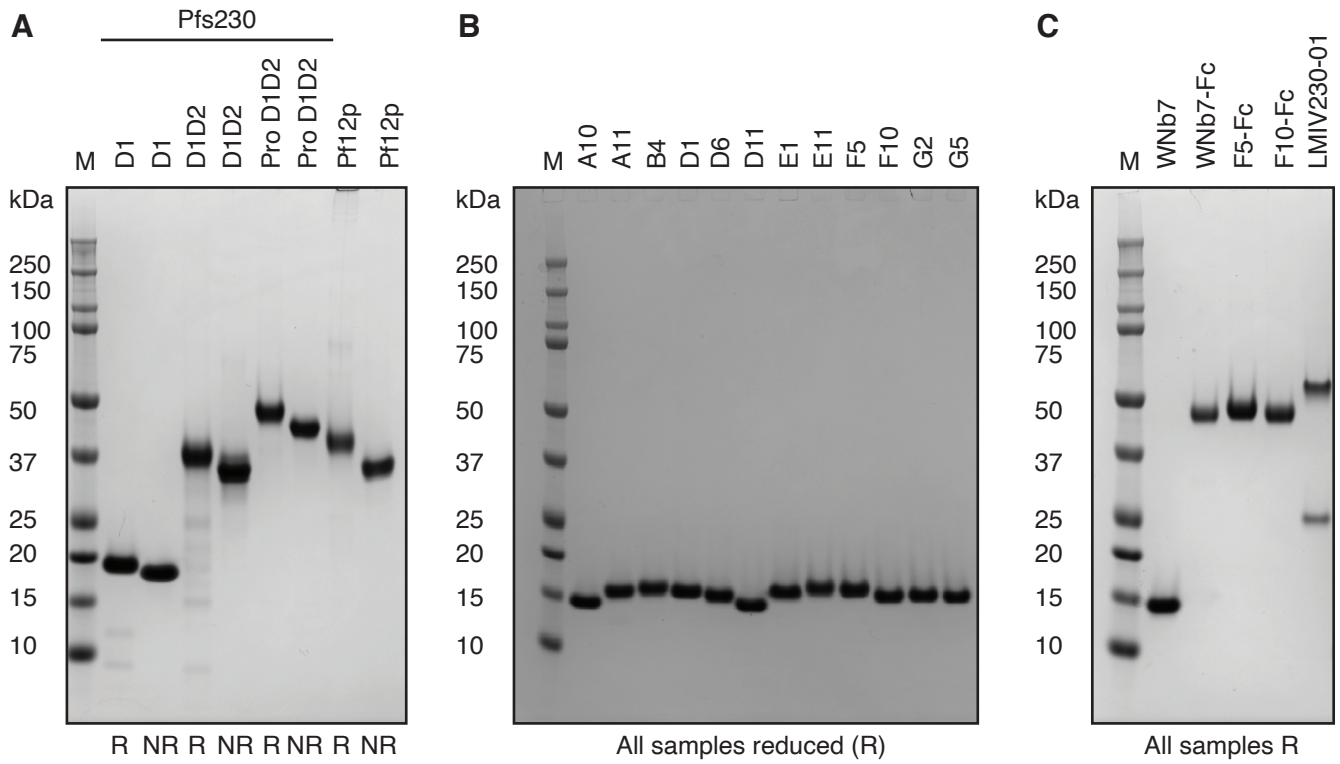

Fig. S1. Coomassie-stained SDS-PAGE gels of purified recombinant proteins. (A) Recombinant Pfs230 proteins and Pf12p under reducing (R) as well as non-reducing (NR) conditions. In each case 2  $\mu$ g of protein was loaded. Molecular weight marker with corresponding sizes are indicated (M). (B) Anti-Pfs230 nanobodies under reducing conditions. (C) Control nanobody WNb7, Fc-tagged nanobodies and mAb LMIV230-01 under reducing conditions.

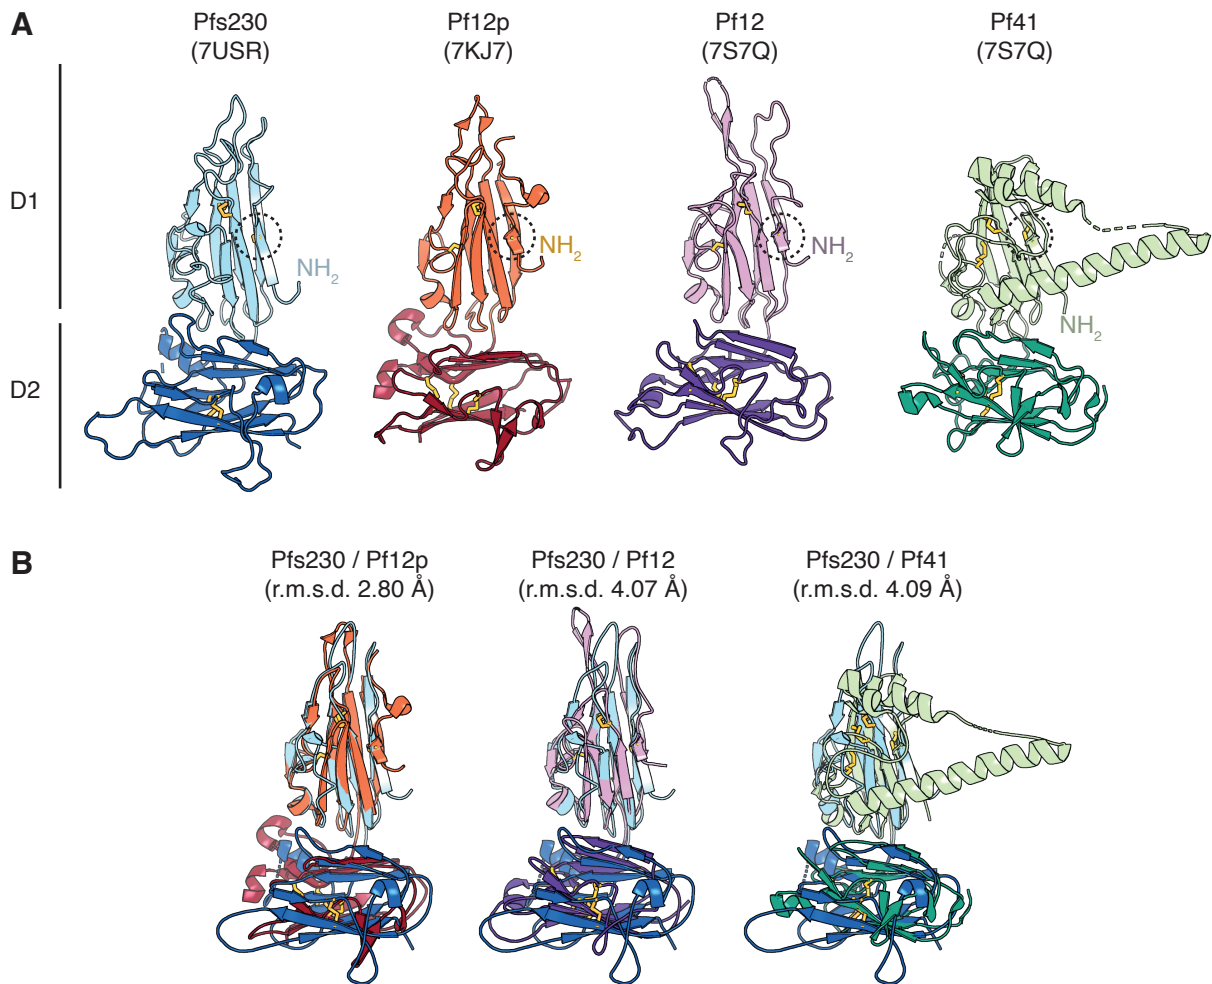

Fig. S2. Crystal structures of 6-cys protein tandem pairs. (A) Crystal structures of different 6-cys protein family members are shown; Pfs230 (blue), Pf12p (orange), Pf12 (purple) and Pf41 (green) with A-type 6-cys domains (D1) shown in light shade and B-type 6-cys domains (D2) shown in darker shade. Disulfide bonds are shown in ball and stick representation (yellow). Dashed circle indicates disulfide bonds that connect the first two  $\beta$ -strands in A-type domains. Corresponding PDB ID are indicated. (B) Structural alignment of Pfs230 D1D2 with Pf12p (PDB ID 7KJ7), Pf12 (PDB ID 7S7Q) and Pf41 (PDB ID 7S7Q).

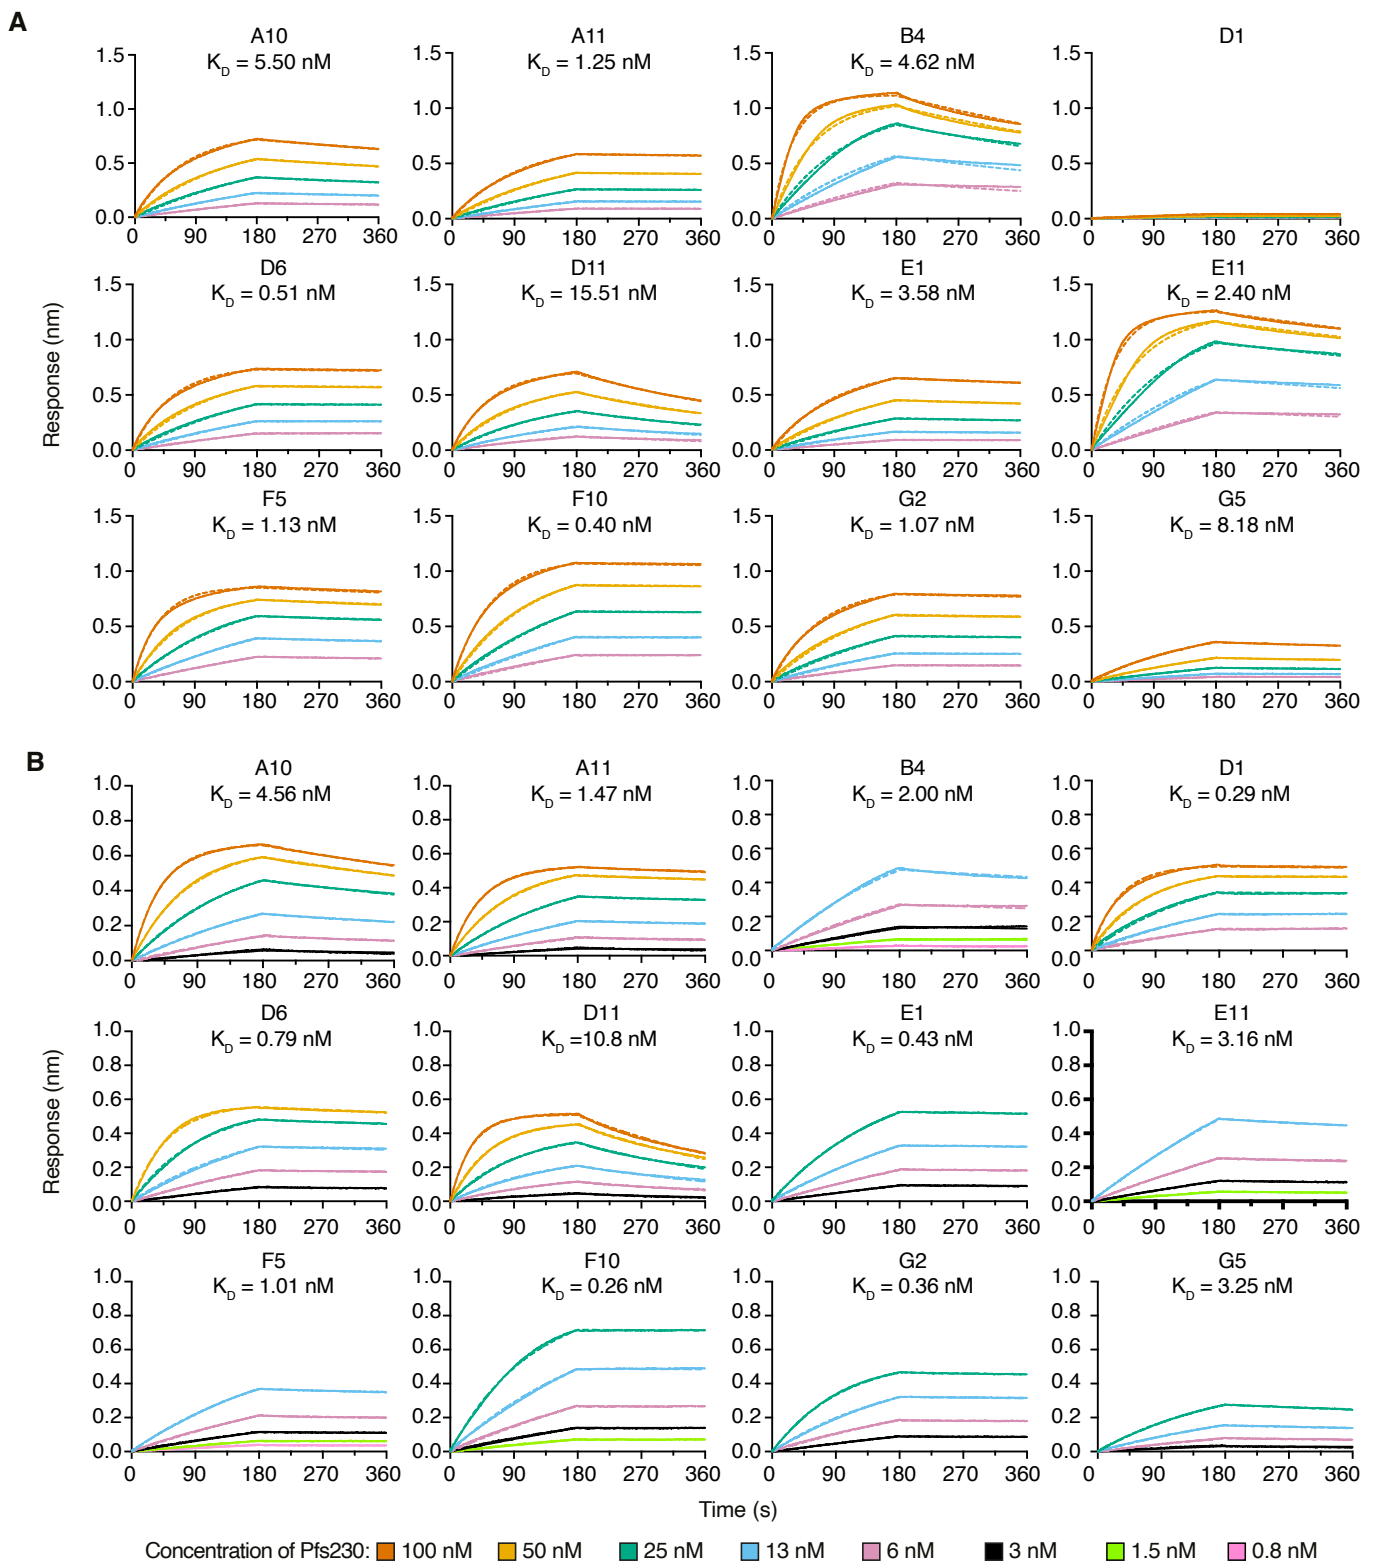

**C**

| Pfs230 Nbs | Pfs230 D1D2          |                                       |                                   | Pfs230 D1           |                                       |                                   |
|------------|----------------------|---------------------------------------|-----------------------------------|---------------------|---------------------------------------|-----------------------------------|
|            | $K_D$ (nM)           | $k_a$ ( $\times 10^5 M^{-1} s^{-1}$ ) | $k_d$ ( $\times 10^{-5} s^{-1}$ ) | $K_D$ (nM)          | $k_a$ ( $\times 10^5 M^{-1} s^{-1}$ ) | $k_d$ ( $\times 10^{-5} s^{-1}$ ) |
| A10        | 5.87 ( $\pm 0.52$ )  | 1.37 ( $\pm 0.04$ )                   | 80.50 ( $\pm 9.76$ )              | 3.18 ( $\pm 1.95$ ) | 2.53 ( $\pm 0.17$ )                   | 78.80 ( $\pm 44.12$ )             |
| A11        | 1.43 ( $\pm 0.25$ )  | 1.07 ( $\pm 0.02$ )                   | 15.20 ( $\pm 2.97$ )              | 1.56 ( $\pm 0.13$ ) | 2.49 ( $\pm 0.33$ )                   | 39.00 ( $\pm 8.20$ )              |
| B4         | 4.80 ( $\pm 0.25$ )  | 3.17 ( $\pm 0.08$ )                   | 152.00 ( $\pm 11.31$ )            | 1.71 ( $\pm 1.62$ ) | 14.05 ( $\pm 12.52$ )                 | 138.50 ( $\pm 13.44$ )            |
| D1         | N/A                  | N/A                                   | N/A                               | 0.14 ( $\pm 0.20$ ) | 2.35 ( $\pm 0.35$ )                   | 3.72 ( $\pm 5.24$ )               |
| D6         | 0.63 ( $\pm 0.17$ )  | 1.73 ( $\pm 0.06$ )                   | 10.84 ( $\pm 2.50$ )              | 0.39 ( $\pm 0.56$ ) | 3.61 ( $\pm 0.78$ )                   | 15.76 ( $\pm 22.27$ )             |
| D11        | 16.15 ( $\pm 0.92$ ) | 1.62 ( $\pm 0.00$ )                   | 261.50 ( $\pm 14.85$ )            | 8.31 ( $\pm 3.53$ ) | 3.09 ( $\pm 0.06$ )                   | 256.00 ( $\pm 104.70$ )           |
| E1         | 3.91 ( $\pm 0.46$ )  | 1.05 ( $\pm 0.03$ )                   | 40.95 ( $\pm 3.89$ )              | 0.75 ( $\pm 0.29$ ) | 2.52 ( $\pm 0.27$ )                   | 19.00 ( $\pm 8.66$ )              |
| E11        | 2.54 ( $\pm 0.19$ )  | 2.90 ( $\pm 0.04$ )                   | 73.35 ( $\pm 4.31$ )              | 2.61 ( $\pm 0.90$ ) | 2.36 ( $\pm 1.26$ )                   | 53.93 ( $\pm 6.96$ )              |
| F5         | 1.22 ( $\pm 0.12$ )  | 2.58 ( $\pm 0.08$ )                   | 31.30 ( $\pm 2.12$ )              | 0.81 ( $\pm 0.20$ ) | 4.07 ( $\pm 1.15$ )                   | 31.57 ( $\pm 2.49$ )              |
| F10        | 0.45 ( $\pm 0.08$ )  | 1.81 ( $\pm 0.04$ )                   | 8.19 ( $\pm 1.28$ )               | 0.12 ( $\pm 0.13$ ) | 3.89 ( $\pm 0.52$ )                   | 4.80 ( $\pm 5.34$ )               |
| G2         | 1.11 ( $\pm 0.06$ )  | 1.44 ( $\pm 0.04$ )                   | 15.95 ( $\pm 0.21$ )              | 0.49 ( $\pm 0.35$ ) | 3.72 ( $\pm 0.27$ )                   | 17.93 ( $\pm 12.45$ )             |
| G5         | 9.09 ( $\pm 1.29$ )  | 0.63 ( $\pm 0.03$ )                   | 57.90 ( $\pm 10.75$ )             | 3.36 ( $\pm 1.70$ ) | 1.94 ( $\pm 0.14$ )                   | 63.53 ( $\pm 27.90$ )             |

Fig. S3. Nanobody affinities to Pfs230. (A) Representative binding curves of different Pfs230 D1D2 concentrations to immobilized nanobodies are shown and were fitted using a 1:1 binding model. (B) Representative binding curves of different Pfs230 D1 concentrations to immobilized nanobodies are shown and were fitted using a 1:1 binding model. Corresponding  $K_D$  values are indicated. (C) Table containing determined kinetic and affinity data from two or three independent experiments showing the mean and the standard deviation (SD).

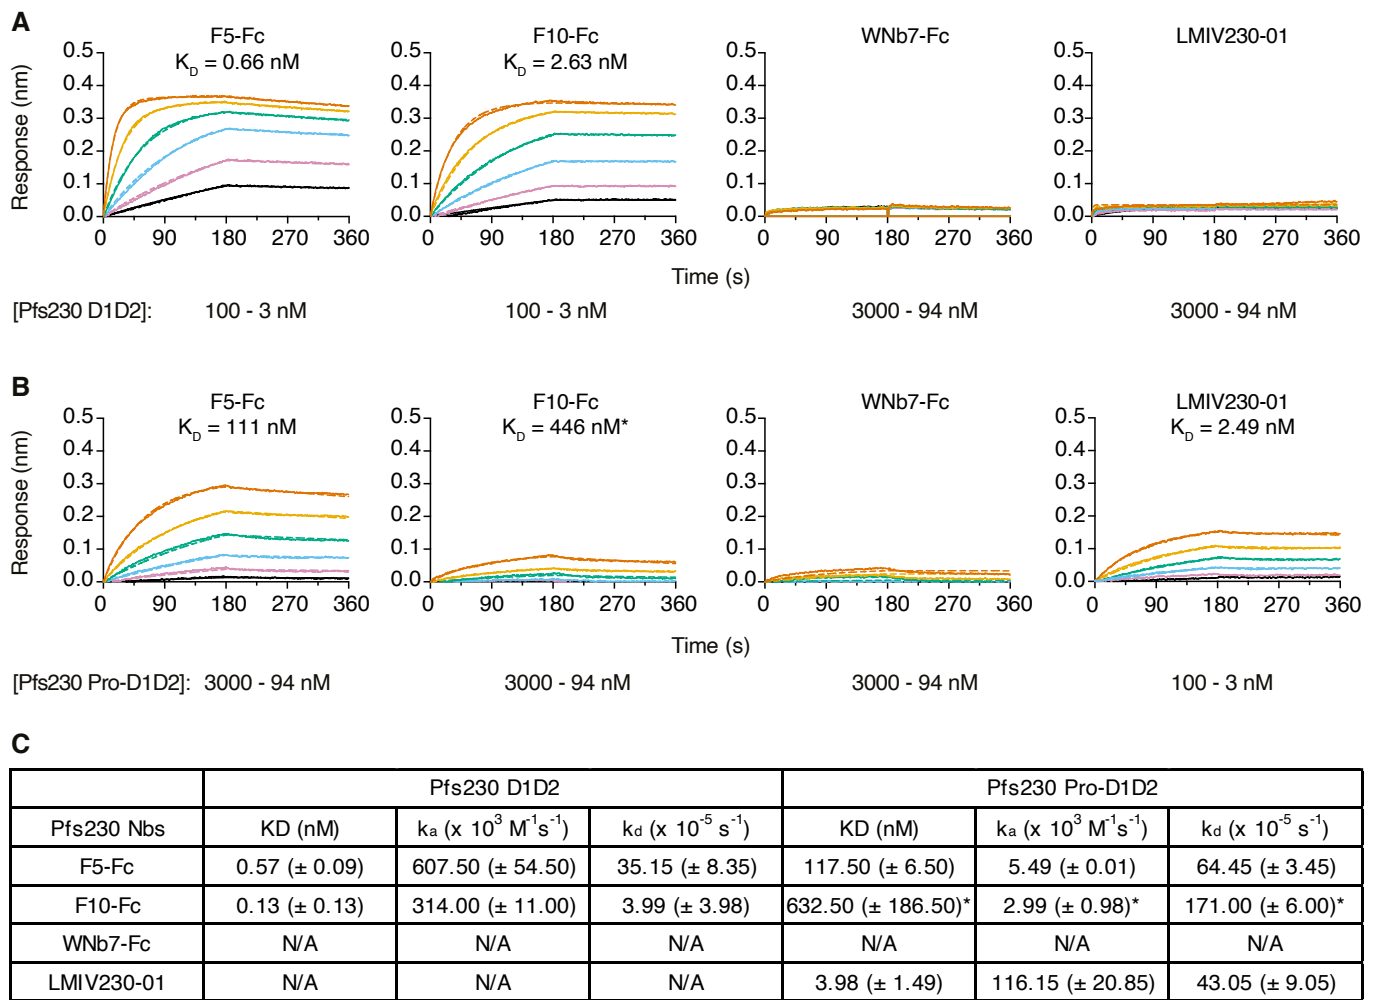

Fig. S4. Fc-tagged nanobody affinities to Pfs230. (A) Representative binding curves of different Pfs230 D1D2 concentrations to immobilized Fc-tagged nanobodies or LMIV230-01 are shown and were fitted using a 1:1 binding model. (B) Representative binding curves of different Pfs230 Pro-D1D2 concentrations to immobilized Fc-tagged nanobodies or LMIV230-01 are shown and were fitted using a 1:1 binding model. Notably, for F10-Fc binding to Pfs230 Pro-D1D2 (\*) only three binding curves were used for fitting. All other affinities and kinetics were determined using five or six binding curves respectively. Corresponding KD values are indicated. (C) Table containing determined kinetic and affinity data from two independent experiments showing the mean and the standard error of mean.



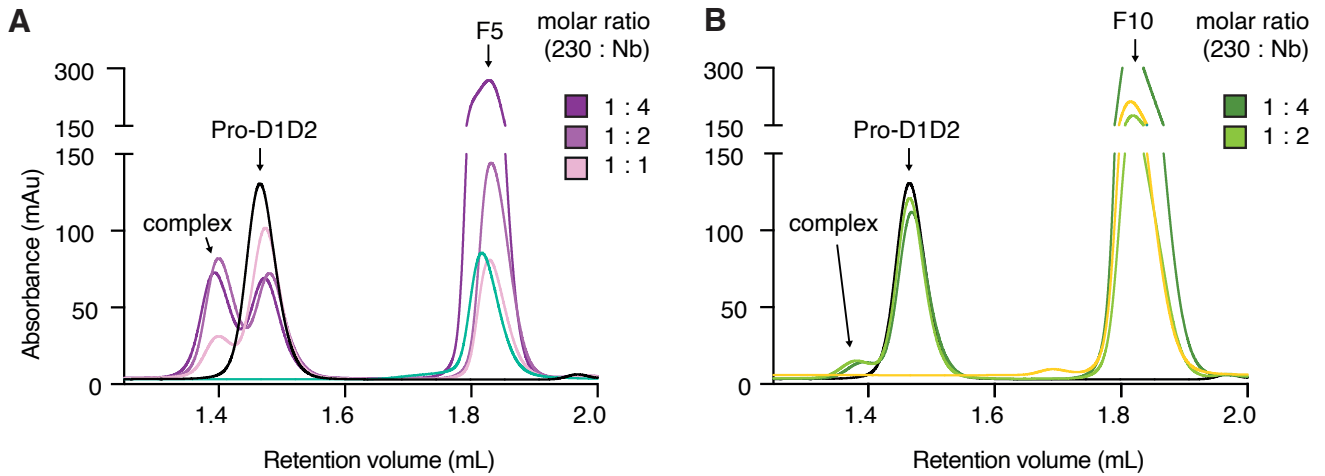

Fig. S5. Size shift assay of Pfs230 Pro-D1D2 with nanobody F5 and F10 respectively. (A) Size exclusion chromatography (SEC) runs of Pfs230 Pro-D1D2 mixed with F5 in different molar ratios (1:1, 1:2 and 1:4 from light to dark purple). SEC runs of Pfs230 Pro-D1D2 (black) and F5 (green) alone are shown in addition. A 1:1 molar mix of F5 with Pfs230 Pro-D1D2 showed a partial shift of the recombinant proteins to higher molecular weight corresponding to a 1:1 complex of nanobody and Pfs230 Pro-D1D2. More complex was formed with a 2:1 molar ratio of nanobody to Pfs230 but this trend did not further increase with a 4-fold molar excess of nanobody. (B) SEC runs of Pfs230 Pro-D1D2 mixed with F10 in different molar ratios (1:2 and 1:4 from light and dark green). SEC runs of Pfs230 Pro-D1D2 (black) and F10 (orange) alone are shown in addition. A small amount of F10-Pfs230 Pro-D1D2 complex was formed using 2, or 4 molar excess of F10.

Supplementary Table S1. Amino acid sequences of anti-Pfs230 nanobodies

| Nb  | full VHH                                                                                                                                    |
|-----|---------------------------------------------------------------------------------------------------------------------------------------------|
| A10 | QVQLQESGGGLVQAGSSLRLSCAASGGTFSNYAMGWFRQAPGKEREVAAIGWSGGTYYTDSVEGRFTISRDN<br>NAKNTVYVYLMNSLKPEDTAVYYCAAKRSGSSWSERGYDYWGQGTQVTVSS             |
| A11 | QVQLQESGGGLVQPGESLRLSCAASGRTSSSYAMGWFRQAPGKEREVAVISWSGGSTYYADSVKGRFTISRDN<br>NAKNTVYVYLMNSLKPEDTAVYYCAADGIFYSDYPLSVDDFHSWGQGTQVTVSS         |
| B4  | QVQLQESGGGLVQPGGSLRLSCAASGFTLDYYGIGWFRQAPGKEREGVSCISSSDGSTYYADSVKGRFTISRDN<br>AKNTVYVYLMNSLKPEDTAVYYCAADLTGIGCTTAQAMGVIGDFGDFGWSWGQGTQVTVSS |
| D1  | QVQLQESGGGLVQAGDSLRLSCTASGRTFSNHAMGWFRQAPGKEREIFAVIFGTGRNSWYVDSVKGRFTISRDN<br>NAKNTVALQMNRLKPEDTAVYYCASGRTWYSGSSMAEYDYWGQGTQVTVSS           |
| D6  | QVQLQESGGGLVQAGDSLRLSCAASGRTFSSYFMGWFRQAPGKEREVAAISWSGGSTYYADSVKGRFTISRDN<br>NVKNTVYVYLMNSLEPEDAAVYYCAGGGSYYPMSPRNGMDYWGKGTQVTVSS           |
| D11 | QVQLQESGGGLVQAGSSLRLSCAASGRTFSSYAMGWFRQAPGKEREVAAIGWSGGTYYTDSVEGRFTISRDN<br>AENTVYVYLMNSLKPEDTAVYYCAAKASGSSWSERGYDYWGQGTQVTVSS              |
| E1  | QVQLQESGGGLVQPGGSLRLSCAASGRTFSSYFMGWFRQAPGKGRVAVISWSGGSTYYADSVKGRFTISRDN<br>NAENTVYVYLMNSLKPEDTAVYYCAAGTRATPLDWASGMDYWGKGTQVTVSS            |
| E11 | QVQLQESGGGLVQPGGSLRLSCAASGFTSDYYGIGWFRQAPGKEREGVACISSSDGSTYYADSVKGRSTISRDN<br>AKNTVYVYLMNSLKPEDTAVYYCAADLSGIGCTTAQAMDVIGDFGDFGWSWGQGTQVTVSS |
| F5  | QVQLQESGGGLVQPGGSLRLSCAASGFTLDRYAIGWFRQAPGKEREGVSCISSSDGSTYYADSVKGRFTISRDN<br>AKNTVYVYLMNSLKPEDTAVYYCARDHGPCTVLADILYDYGMDYWGKGTQVTVSS       |
| F10 | QVQLQESGGGLVQAGGSLRLSCAASGRTFSDYFMGWFRQAPGKEREVAAVSWSGGSTYYADSVKGRFTISRDN<br>DNAKNTVFLQMNLSLKPEDTAVYYCAGGGSYYPMSPYDGMMDYWGKGTQVTVSS         |
| G5  | QVQLQESGGGLVQAGGSLRLSCAASGRTFNAMYWFRQAPGKEREVAVADITWSGSSTYYADSVKGRFTISRDN<br>DNAKNTVFLQMNLSLKPEDTALYYCAADSRYYGIGIGTPRYWGQGTQVTVSS           |
| G2  | QVQLQESGGGLVQAGGSLRLSCAASGRTFSNYFMGWFRQAPGKEREVAAVSWSGGSTYYADSVKGRFTISRDN<br>DNAKNTVYVYLMNSLKPEDTAVYYCAAGERYFPMEPRRGYDYWGQGTQVTVSS          |

Supplementary Table S2. Raw data of the standard membrane feeding assay

| Group          | Experiment 1                  |                       | Experiment 2                  |                       | Experiment 3                  |                       |
|----------------|-------------------------------|-----------------------|-------------------------------|-----------------------|-------------------------------|-----------------------|
|                | Mean oocysts/midgut (min-max) | % infected mosquitoes | Mean oocysts/midgut (min-max) | % infected mosquitoes | Mean oocysts/midgut (min-max) | % infected mosquitoes |
| Untreated      | 28.1 (2-65)                   | 76.7                  | 31.6 (4-68)                   | 80.0                  | 27.1 (1-67)                   | 93.3                  |
| PBS            | 21.0 (4-66)                   | 70.0                  | 28.7 (8-85)                   | 66.7                  | 20.4 (4-86)                   | 73.3                  |
| WNb7-Fc        | 24.3 (3-61)                   | 76.7                  | 35.6 (19-87)                  | 76.7                  | 24.6 (3-51)                   | 70.0                  |
| LMIV230-01     | 0.8 (1-10)                    | 23.3                  | 1.7 (1-11)                    | 36.7                  | 0.5 (1-7)                     | 23.3                  |
| F5-Fc          | 6.0 (1-22)                    | 73.3                  | 4.1 (1-30)                    | 70.0                  | 3.4 (2-18)                    | 53.3                  |
| F10-Fc         | 5.9 (1-38)                    | 60.0                  | 6.9 (1-32)                    | 56.7                  | 3.7 (1-20)                    | 46.7                  |
| F5-Fc + F10-Fc | 4.6 (1-21)                    | 76.6                  | 3.8 (1-25)                    | 80.0                  | 4.1 (1-14)                    | 73.3                  |

Supplementary Table S3. Interactions Pfs230 D1 – F5 complex

| Pfs230                               | Group   | F5      | Location | Group   | Distance |
|--------------------------------------|---------|---------|----------|---------|----------|
| Hydrogen bonds                       |         |         |          |         |          |
| Lys 653                              | NZ      | Ala 107 | CDR3     | O       | 3.0      |
| Leu 658                              | O       | Tyr 113 | CDR3     | OH      | 3.0      |
| Glu 660                              | N       | Tyr 113 | CDR3     | OH      | 3.6      |
| Arg 720                              | NH1     | Pro 102 | CDR3     | O       | 3.2      |
| Arg 720                              | NH1     | Thr 104 | CDR3     | OG1     | 2.9      |
| Salt bridges                         |         |         |          |         |          |
| Lys 659                              | NZ      | Glu 44  | FR2      | OE2     | 3.2      |
| Arg 720                              | NH2     | Asp 99  | CDR3     | OD2     | 2.8      |
| Other interfacing residues in Pfs230 |         |         |          |         |          |
| Pro 606                              | Lys 607 | Val 608 | Lys 610  | Val 642 | Leu 651  |
| Thr 656                              | Lys 657 | Tyr 703 | Ile 705  | Asp 707 | Ser 709  |
| Lys 710                              | Ile 722 |         |          |         |          |
| Other interfacing residues in F5     |         |         |          |         |          |
| Arg 31                               | Arg 45  | Glu 46  | Gly 47   | Ser 53  | His 100  |
| Gly 101                              | Cys 103 | Leu 106 | Asp 108  | Ile 109 | Leu 110  |
| Tyr 111                              | Gly 114 | Asp 116 |          |         |          |

Supplementary Table S4. Interactions Pfs230 D1 – F10 complex

| Pfs230                               | Group   | F10     | Location | Group   | Distance |
|--------------------------------------|---------|---------|----------|---------|----------|
| Hydrogen bonds                       |         |         |          |         |          |
| Glu 590                              | OE1     | Ser 101 | CDR3     | OG      | 2.9      |
| Glu 590                              | O       | Tyr 102 | CDR3     | N       | 3.0      |
| Glu 590                              | N       | Gly 100 | CDR3     | O       | 3.7      |
| Val 592                              | N       | Tyr 102 | CDR3     | O       | 2.9      |
| Glu 612                              | O       | Tyr 59  | CDR2     | OH      | 2.7      |
| Lys 614                              | NZ      | Thr 58  | CDR2     | O       | 2.8      |
| Lys 614                              | N       | Tyr 59  | CDR2     | OH      | 3.0      |
| Lys 614                              | O       | Ser 57  | CDR2     | OG      | 3.5      |
| Asn 616                              | ND2     | Gly 56  | CDR2     | O       | 2.8      |
| Asn 616                              | OD1     | Ser 57  | CDR2     | N       | 3.8      |
| Asn 616                              | OD1     | Ser 57  | CDR2     | OG      | 3.0      |
| Glu 617                              | OE2     | Ser 52  | CDR2     | OG      | 2.6      |
| Glu 617                              | OE1     | Ser 54  | CDR2     | N       | 2.9      |
| Salt bridges                         |         |         |          |         |          |
| Lys 589                              | NZ      | Asp 31  | CDR1     | OD1     | 3.9      |
| Other interfacing residues in Pfs230 |         |         |          |         |          |
| Thr 587                              | Asn 588 | Tyr 591 | Cys 593  | Asp 594 | Phe 595  |
| Lys 609                              | Lys 610 | Cys 611 | Val 613  | Val 615 | Ile 620  |
| Ile 625                              |         |         |          |         |          |
| Other interfacing residues in F10    |         |         |          |         |          |
| Ser 30                               | Phe 33  | Trp 53  | Tyr 103  | Pro 104 | Met 105  |
| Ser 106                              |         |         |          |         |          |
